# Supplementary material for: Patient-Derived Colorectal Cancer Organoids Upregulate Revival Stem Cell Marker Genes Following Chemotherapeutic Treatment
Source: PubMed Central journal article supplement (PMC7019342; doi:10.3390/jcm9010128), 2020-01-02
Supplement: jcm-09-00128-s001.pdf [file jcm-09-00128-s001.pdf]

**Table S1.** Patient clinical information.

| Patient | Overall Stage | Age | Gender | dMMR Status | Tumour Site                    | Tumour Type       | Differentiation | Years from Surgery | Current Status                     | Time to Progression |
|---------|---------------|-----|--------|-------------|--------------------------------|-------------------|-----------------|--------------------|------------------------------------|---------------------|
| 58T     | 1             | 75  | M      | normal      | sigmoid colon                  | adeno             | poor            | 1.9                | Alive, no recurrence               | n/a                 |
| 63T     | 1             | 79  | F      | normal      | ascending colon                | adeno             | mod             | 1.0                | Alive, no recurrence               | n/a                 |
| 30T     | 2             | 86  | F      | normal      | ascending colon                | adeno<br>mucinous | mod             | 2.0                | Deceased, second<br>primary cancer | 1.8                 |
| 61T     | 2             | 87  | F      | normal      | transverse colon               | adeno             | mod             | 2.0                | Alive, no recurrence               | n/a                 |
| 38T     | 3             | 84  | F      | normal      | sigmoid colon                  | adeno             | mod             | 1.7                | Alive, no recurrence               | n/a                 |
| 53T     | 3             | 81  | M      | normal      | ascending colon                | adeno             | poor            | 1.1                | Alive, no recurrence               | n/a                 |
| 54T     | 3             | 66  | F      | normal      | caecum                         | adeno             | poor            | 1.3                | Alive, no recurrence               | n/a                 |
| 46T     | 3             | 74  | F      | normal      | hepatic flexure                | adeno             | mod             | 2.0                | Alive, no recurrence               | n/a                 |
| 78T     | 3             | 55  | F      | normal      | rectum upper third<br>(> 12cm) | adeno             | mod             | 1.5                | Alive, no recurrence               | n/a                 |
| 64T     | 4             | 41  | F      | normal      | caecum                         | adeno             | poor            | 1.8                | Alive, with disease*               | 1.48                |
| 67T     | 4             | 38  | M      | normal      | rectum upper third<br>(> 12cm) | adeno             | mod             | 1.8                | Alive, no recurrence#              | 1.75                |
